# Supplementary material for: Crude to leads: a triple-pronged direct NMR approach in coordination with docking simulation
Source: Royal Society of Chemistry journal article supplement (doi:10.1039/c3an00728f), 2013-01-01
Supplement: c3an00728f.pdf [file c3an00728f.pdf]

## SUPPORTING INFORMATION

### Crude to Leads: A triple-pronged direct NMR approach in coordination with docking simulation

Sheraz A.K. Tanoli<sup>a</sup>, Nazish U. Tanoli<sup>a</sup>, Tatiani M. Bondancia<sup>b</sup>, Saman Usmani<sup>d</sup> Rainer Kerssebaum<sup>c</sup>, Antonio G. Ferreira<sup>a\*</sup>, Joao B. Fernandes<sup>b</sup>, Zaheer-Ul-Haq<sup>d</sup>

<sup>a</sup>: Laboratory of nuclear Magnetic Resonance Federal University of Sao Carlos, Rodovia Washington Luiz, Km 235, Brazil

<sup>b</sup>: Department of Chemistry, Federal University of Sao Carlos, Rodovia Washington Luiz, Km 235, Brazil.

<sup>c</sup>: Bruker Bio Spin GmbH Silberstreifen, 76287 Rheinstetten, Germany

<sup>d</sup>:Dr. Panjwani Center for Molecular Medicine and Drug Research, International Center for Chemicals and Biological Sciences, University of Karachi, Karachi-75210, Pakistan

Correspondence to:

Fax: +55 16 3351-8350; Tel: +55 (16) 3351-8068

Prof.drgiba@gmail.com

Table of contents

Page 2: Figure S-1 Isolation scheme

Page 3: Figure S-2 LC-Chromatogram with marked elution peaks

Page 4: Figure S-3 A complete 2D tr-NOESY spectrum with possible assigned signals of extract with protein

Page 5: Figure S-4a complete 2D TOCSY spectrum of extract with protein

Page 6: Figure S-4b complete 2D STD-TOCSY spectrum of extract with protein

Page 7: Figure S-5 Separation method developed for LC-SPE-NMR

Page 8: Figure S-6 Electrospray Ionization spectrum of Peak 6 of LC-chromatogram

Page 9: Figure S-7, selected active Residues site of Bovine Serum Albumin.

Page 10: Figure S-8a-b, docking results of Compounds 1.

Page 11: Figure S-9a-b, docking results of Compounds 3.

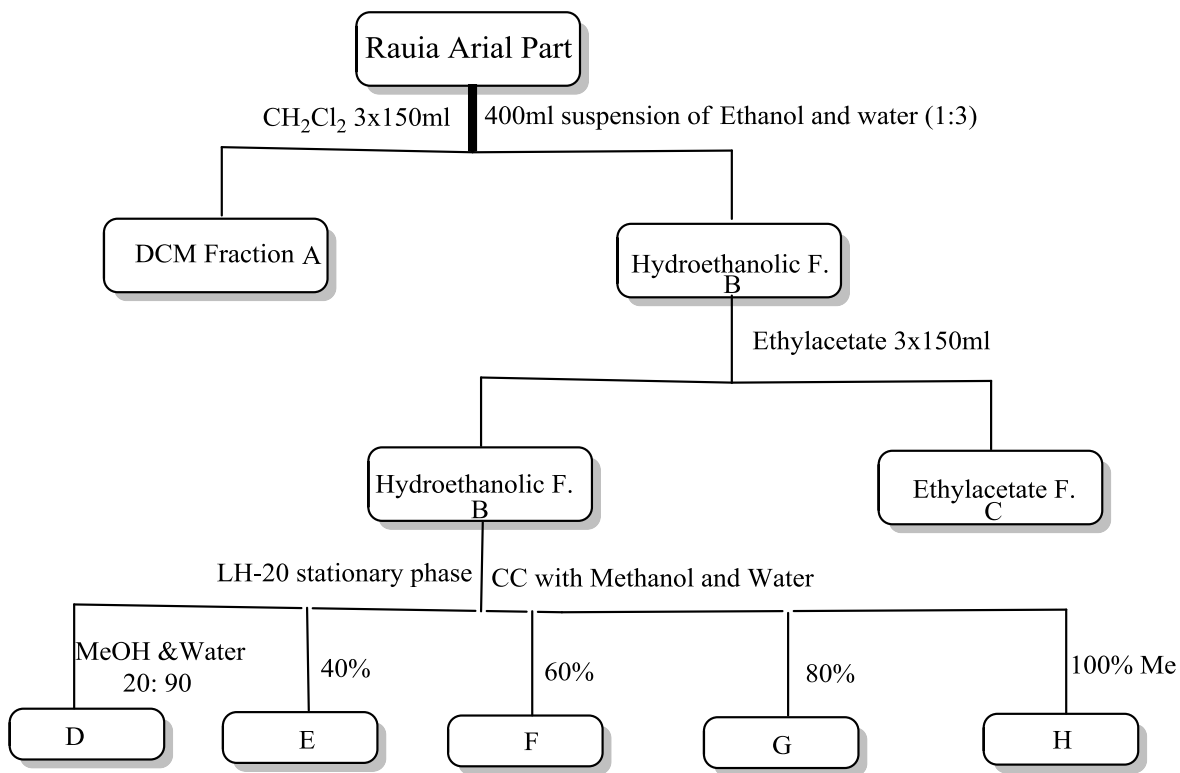

**Figure S-1.** Isolation Scheme for arial parts of Rauia plant

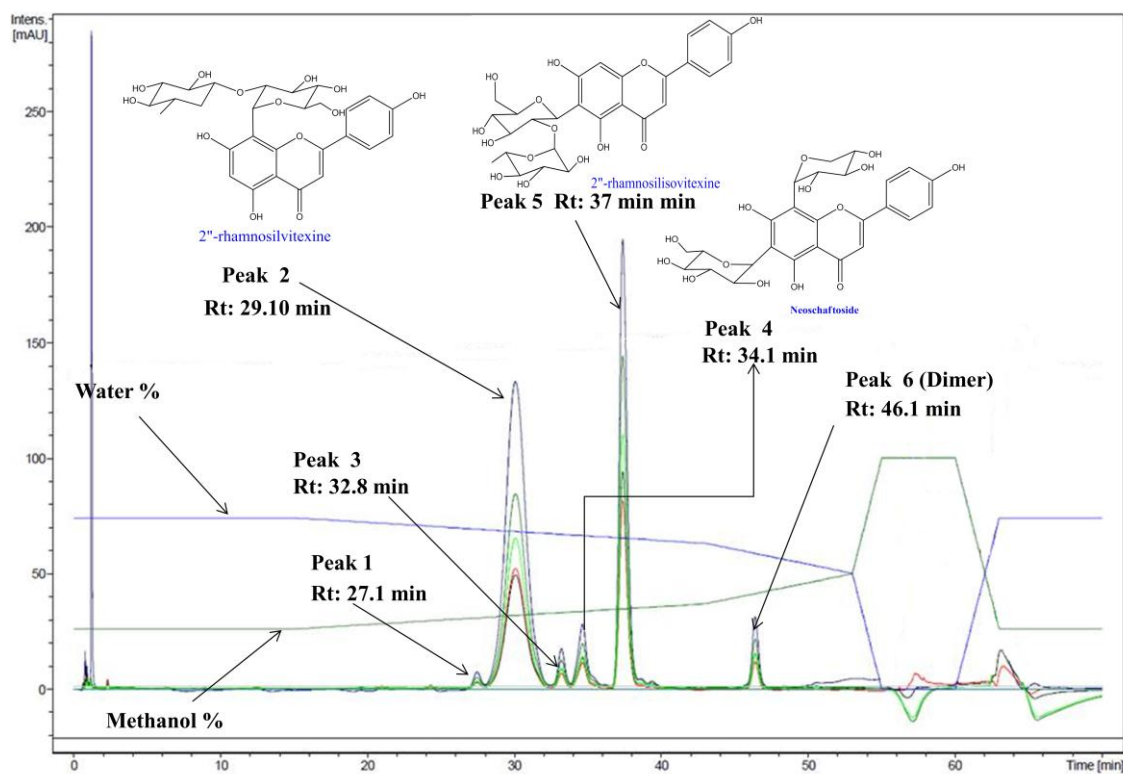

**Figure S-2.** Chromatogram obtained as result of separation with LC-Method by using water and methanol as solvent at different gradients.

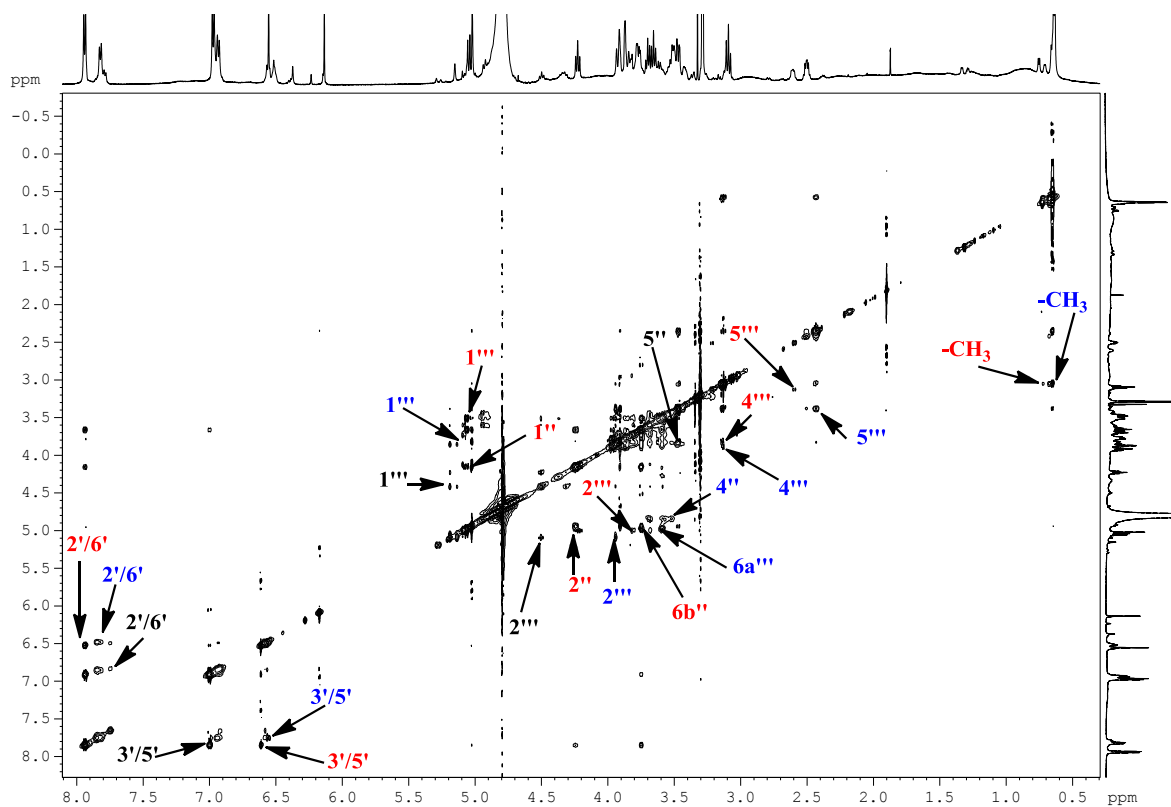

**Figure S-3.** Two-dimensional transfer NOESY with Bruker standard phase sensitive pulse sequence for the extract in D<sub>2</sub>O and methanol (95:5% v/v) and BSA in buffer solution. In transfer NOESY pulse sequence is modified by putting the 3500Hz spin lock for the removal of unwanted protein signal before the first  $\pi/2$  pulse. This spectrum is produced by the use of 400ms mixing time with at 600 MHz Bruker NMR spectrometer with a cryoprobe TCI at 298 K. NOE cross-peaks shown are of the same sign as of the diagonal signals (Negative NOEs).

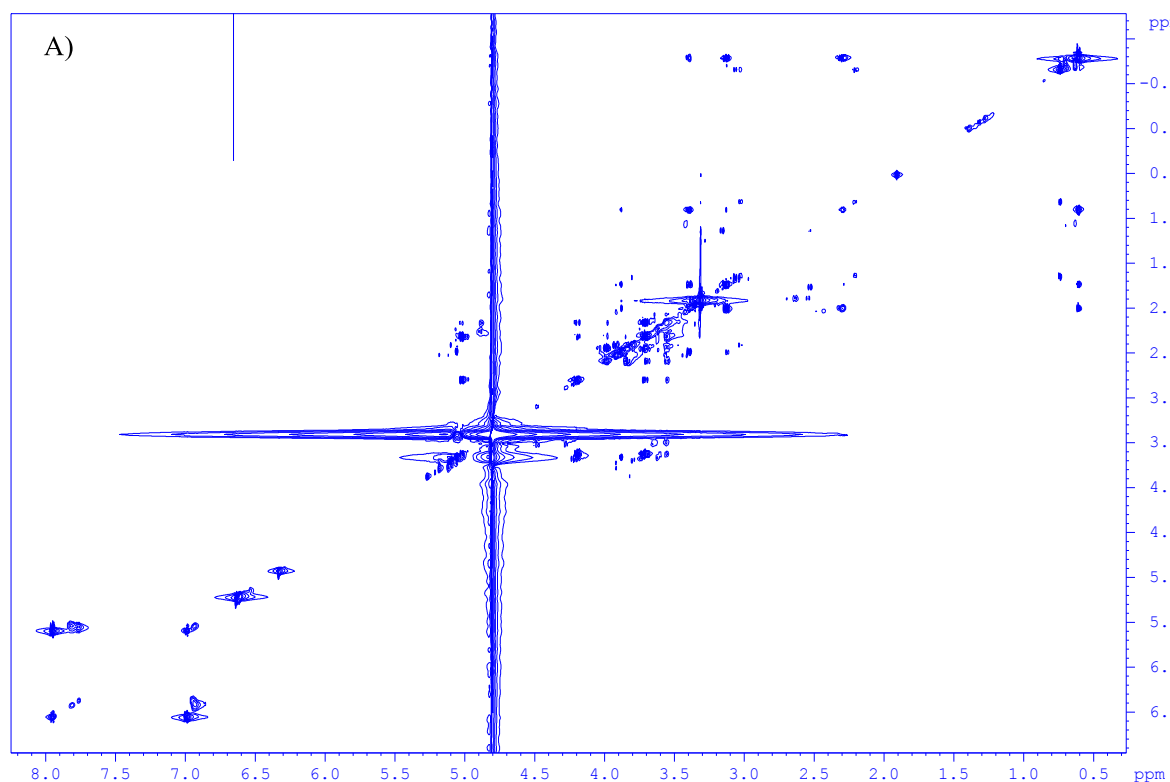

**Figure S-4a.** A standard 2D TOCSY NMR spectrum of crude extracts with 50ul BSA is shown.

Experiment was done by using a Malcolm Levitt's composite-pulse decoupling sequence (MLEV-17) with mixing time of 60 ms at 298K with 600MHz Spectrometer. For standard TOCSY MLEV-17 sequence the experimented was recorded with 7211.539Hz spectral width in both dimensions ( $F_1$  and  $F_2$ ) with a total number of 56 scans, with 256 increments in  $t_1$  were collected with 2s relaxation delay for each scan; with the experimental time less than 10hrs..Other conditions are according to the experimental section. TOCSY spectrum was acquired in 1mg of the extract in  $D_2O$ : methanol (95:5% v/v) and BSA in buffer (7.4pH) solution respectively.

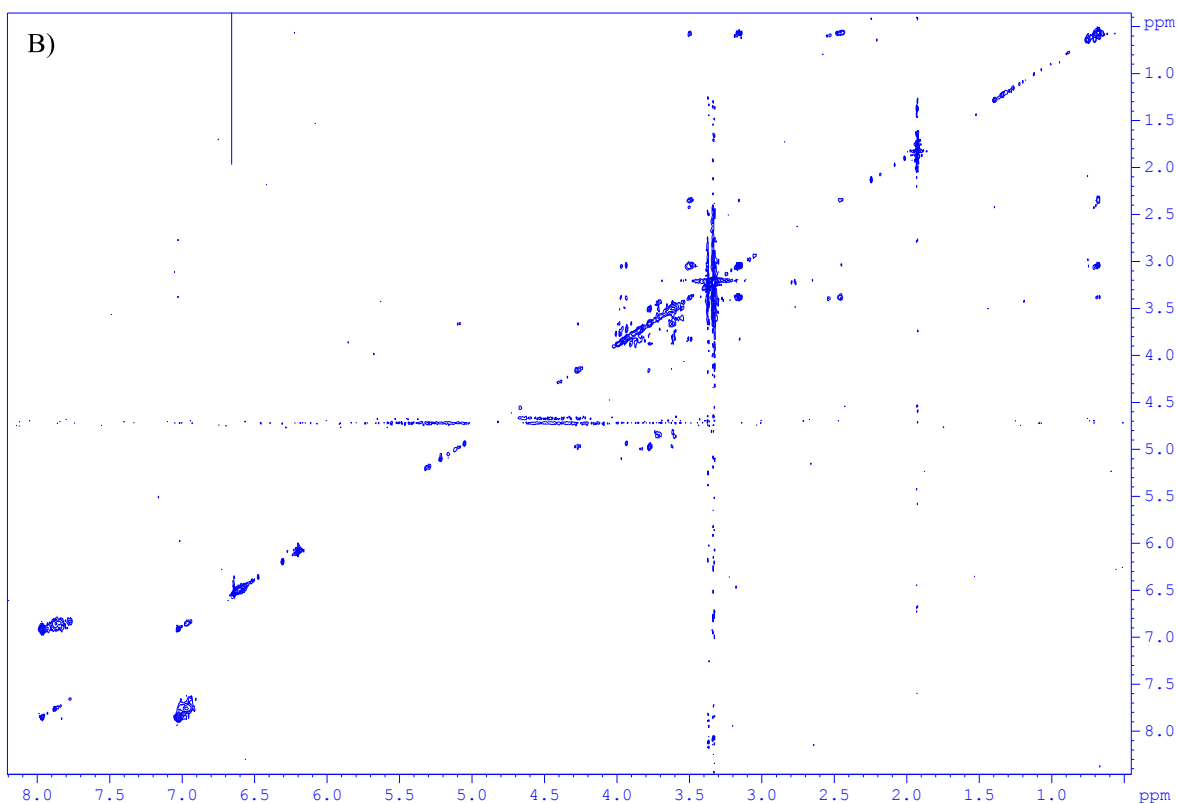

**Figure S-4b.** Two-dimensional STD-TOCSY NMR spectra of crude extracts with 50 $\mu$ M BSA by using a Malcolm Levitt's composite-pulse decoupling sequence (MLEV-17) with mixing time of 60 ms at 298K with 600MHz Spectrometer. In STD-TOCSY saturation of the protein was achieved with a cascade of 50Gaussian pulse (50 ms duration each) with a delay of 200 ms in between each pulse, with a total saturation time of 2.5 s. The on-resonance saturation frequency was set to -0.5 ppm and off-resonance to 30 ppm. 2D STD-TOCSY Spectrum was recorded with 7211.539Hz spectral width in both dimensions ( $F_1$  and  $F_2$ ) with 64 transients in  $t_2$  and with 384 increments for the *on* and *off* resonance in  $t_1$  with the total experimental time of more than 16hrs. Both spectra (2D standard and STD TOCSY) were acquired in 1mg of the extract in D<sub>2</sub>O: methanol (95:5% v/v) and BSA in buffer(7.4pH) solution respectively.

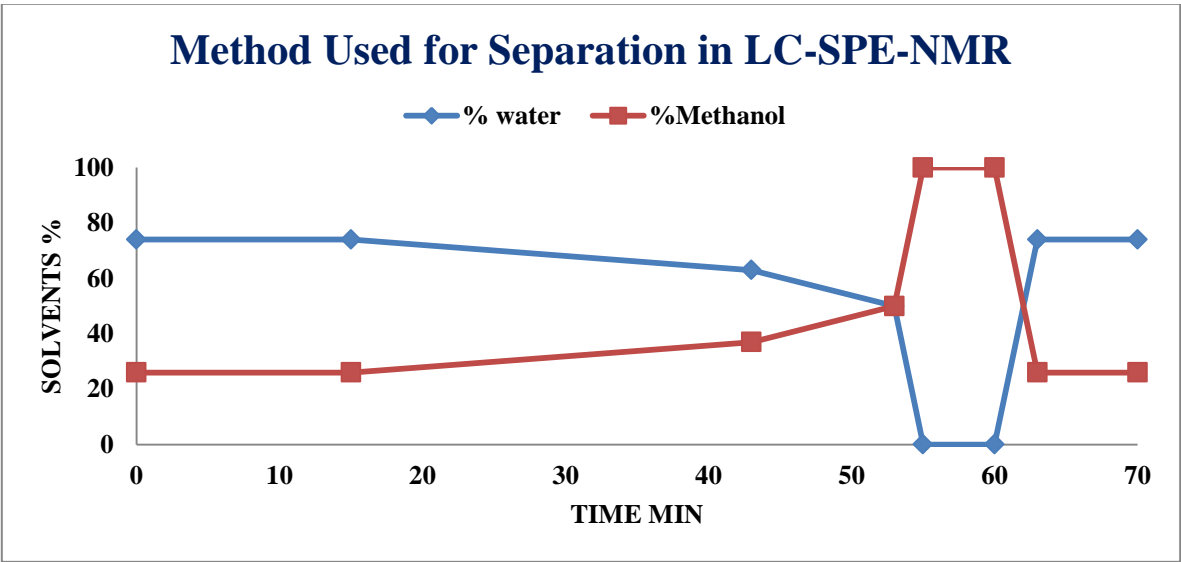

*Figure S-5.* Separation method and the solvent gradient used in LC-Method

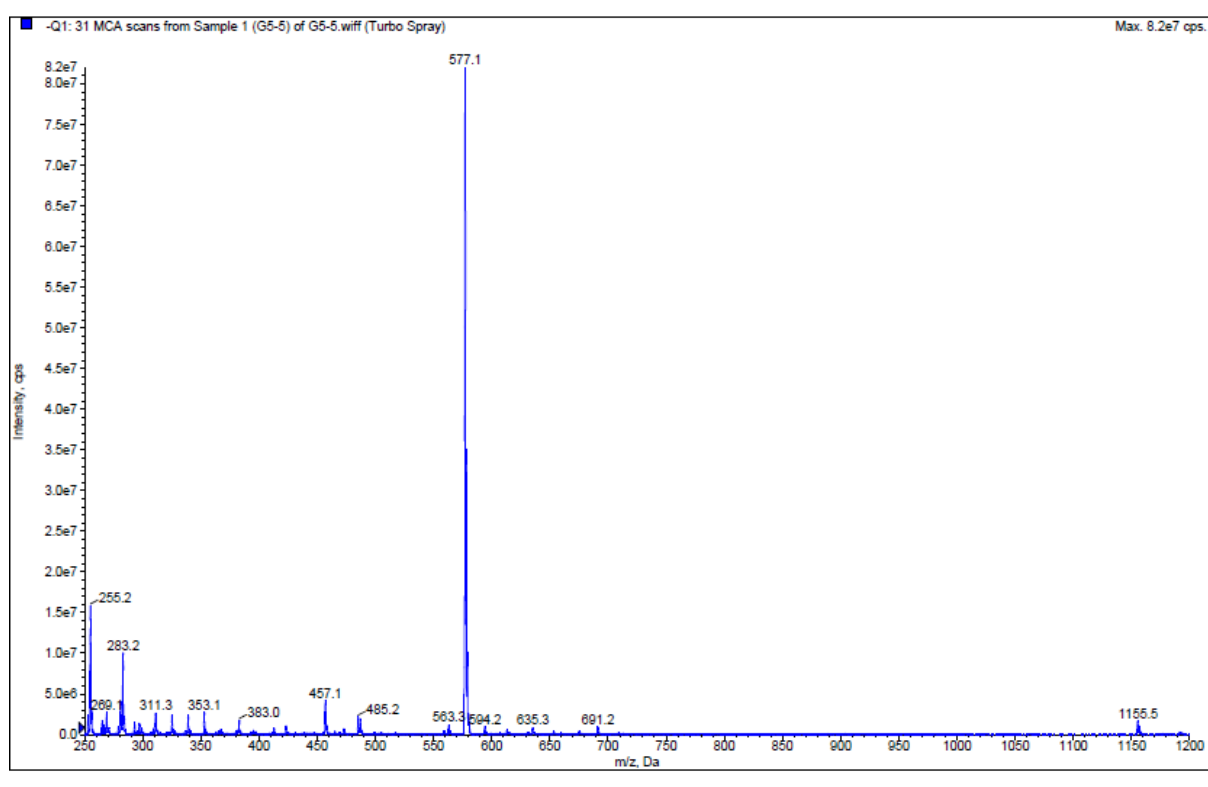

**Figure S-6.** ESI spectrum of peak 6 of LC-chromatogram, showing the molecular weight 1155.5 a.m.u.



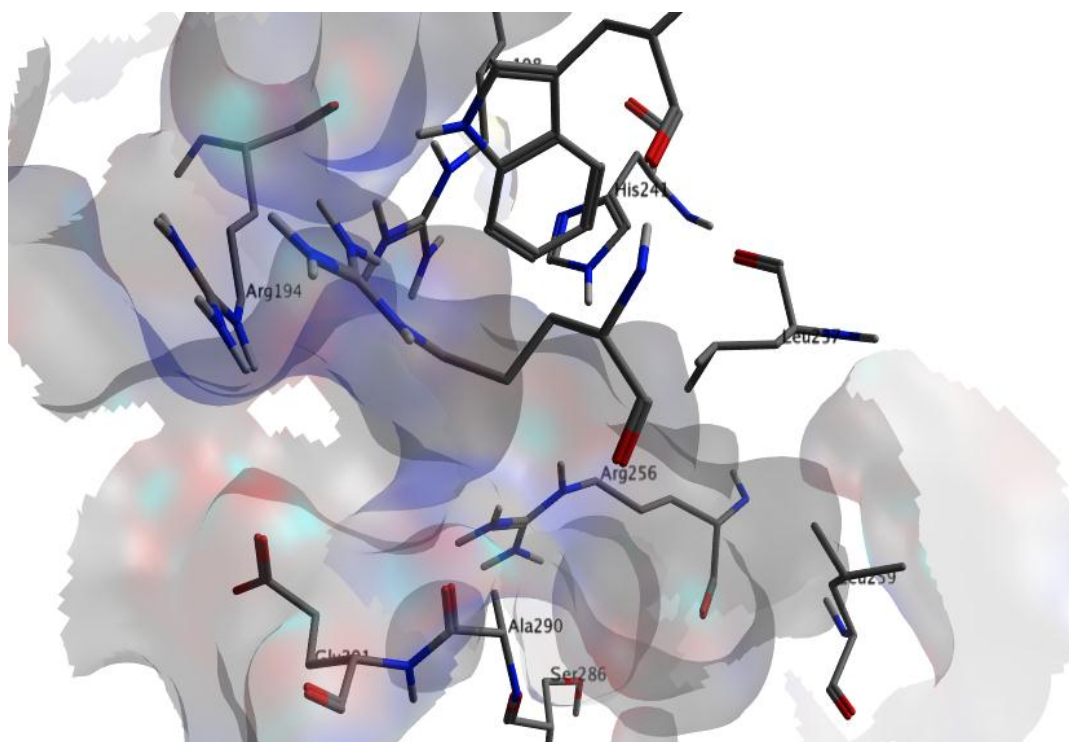

**Figure S-7:** Selected Active site of chain B of the Bovine Serum Albumin (BSA), generated by using Molecular Operating Environment (MOE) 2011.10. BSA PDB file was taken from protein data bank (<http://www.rcsb.org/pdb/explore.do?structureId=4F5S>) (4F5S). The classical binding sites were marked in corresponding subdomain cations.

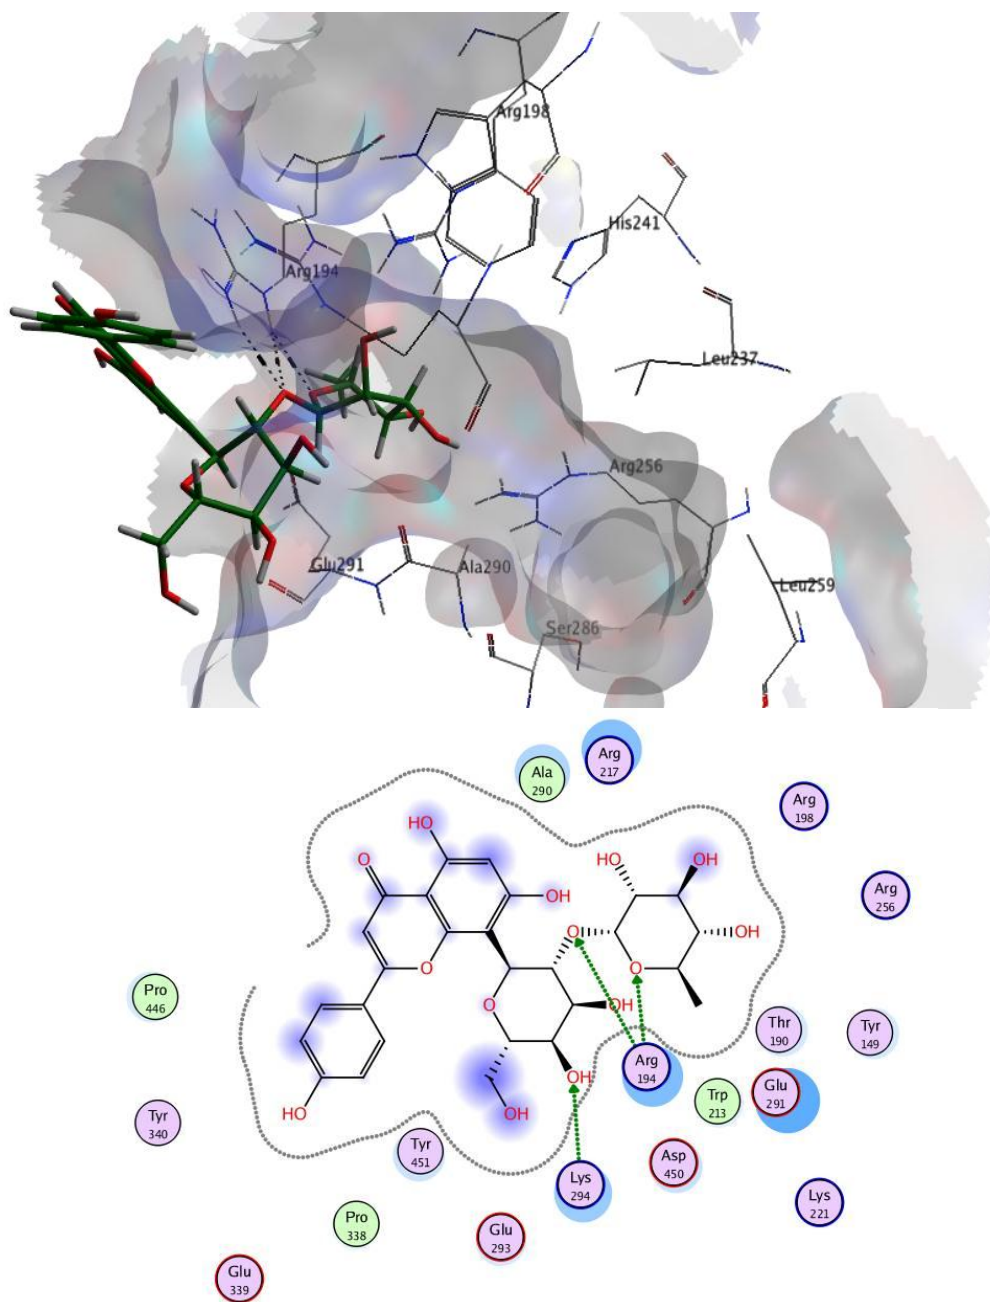

**Figure S-8a-b:** Molecular Docking model of interactions between the Bovine Serum Albumin (BSA) and Vetexine-2-rhamnoside, **1**, generated by using Molecular Operating Environment (MOE) 2011.10. BSA PDB file was taken from protein data bank (<http://www.rcsb.org/pdb/explore.do?structureId=4F5S>) (4F5S). The classical binding sites were marked in corresponding subdomain cations. See more details in experimental section.

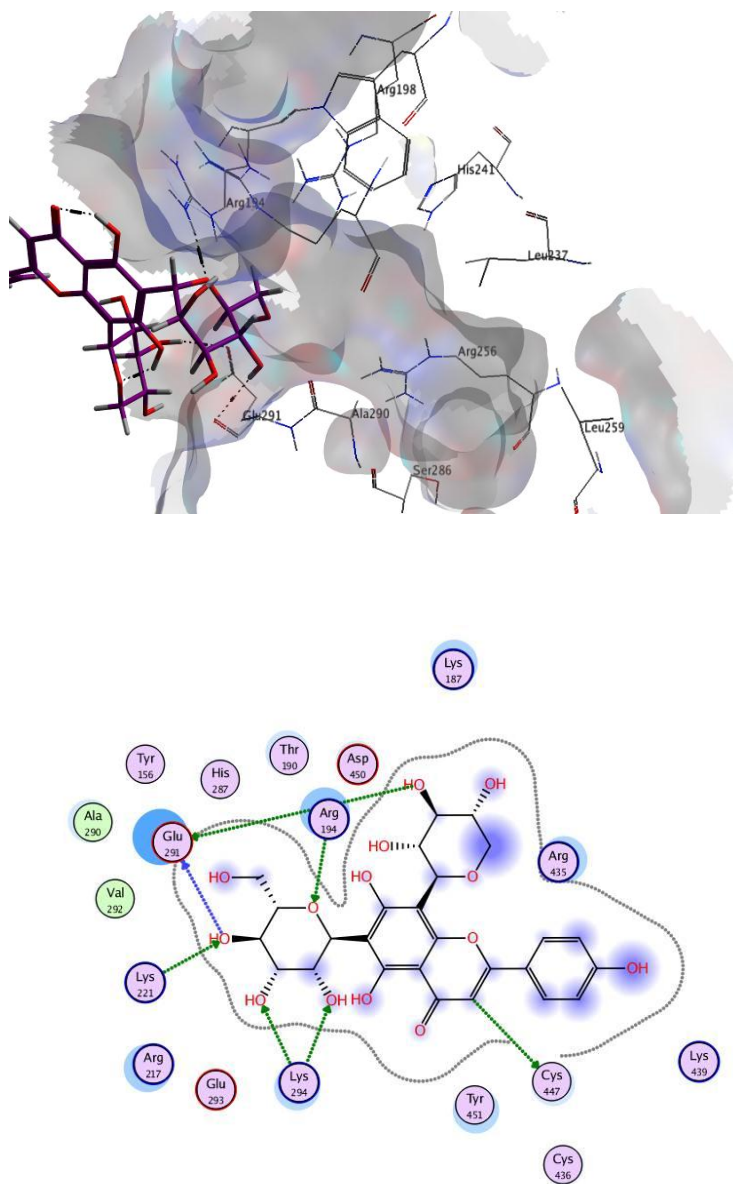

**Figure S-9a-b:** Molecular Docking model of interactions between the Bovine Serum Albumin (BSA) and Neoschiftosoide, **3**, generated by using Molecular Operating Environment (MOE) 2011.10. BSA PDB file was taken from protein data bank (<http://www.rcsb.org/pdb/explore.do?structureId=4F5S>) (4F5S). The classical binding sites were marked in corresponding subdomain cations. See more details in experimental section.
